# Supplementary material
Source: PubMed Central journal article supplement (PMC3822723)
Supplement: jcmm0014-2729-SD1.pdf [file jcmm0014-2729-SD1.pdf]

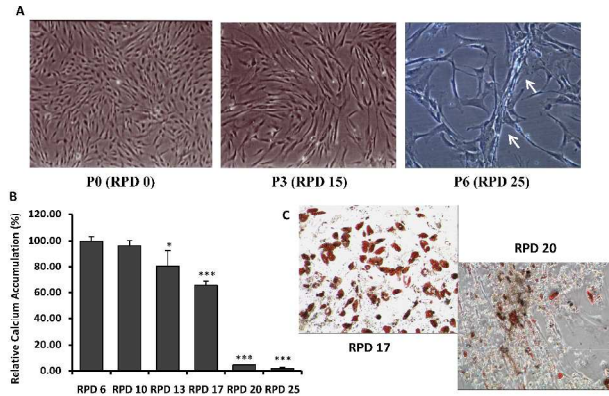

Fig. S1 Alves et al

Figure S1. hMSC morphology and differentiation is affected by in vitro expansion

A) Phase-contrast photos of hMSCs at different RPD, x40 magnification. An evident change in cell size and morphology can be observed with increased time of culture. B) Change in the mineralization potential after in vitro expansion. Relative calcium accumulation by hMSCs in MM after 28 days, expressed as percentage reduction in calcium deposition ability over passages compared to RPD 6. No detectable calcium was measured in hMSCs cultured in BM (data not shown). C) Phase-contrast images of hMSC in adipogenic medium at different RPD. Adipocytes are stained with Oil red O and visualized at x40 magnification. Error bars represent standard deviation. Statistical analysis was performed using one-way ANOVA and Tukey post test with a significance level of 0.05. \* represents  $p < 0.01$  to  $0.05$  and \*\*\*  $p < 0.001$ .

297x210mm (600 x 600 DPI)

1  
2  
3  
4  
5  
6  
7  
8  
9  
10  
11  
12  
13  
14  
15  
16  
17  
18  
19  
20  
21  
22  
23  
24  
25  
26  
27  
28  
29  
30  
31  
32  
33  
34  
35  
36  
37  
38  
39  
40  
41  
42  
43  
44  
45  
46  
47  
48  
49  
50  
51  
52  
53  
54  
55  
56  
57  
58  
59  
60

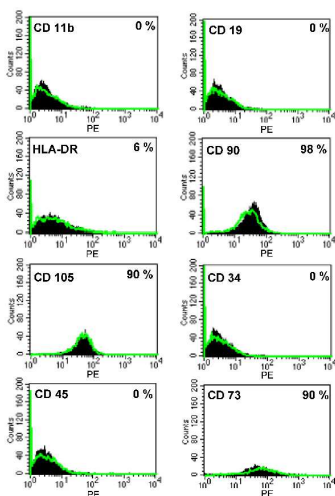

Fig. S2 Alves et al

Figure S2. Immunophenotype of hMSCs (RPD 6 vs RPD 20). Representative overlay of flow cytometry histograms of hMSCs from human bone marrow are presented. Black histogram, RPD 6 and green line, histogram of RPD 20.  
297x210mm (600 x 600 DPI)

Review

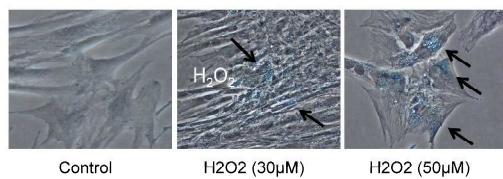

Fig. S3 Alves et al

Figure S3. Senescence-Associated  $\beta$ -galactosidase expression after DNA damage induction. RPD 6 cells were exposed to 0, 30 or 50  $\mu$ M of H<sub>2</sub>O<sub>2</sub> for 6 days after which cells were stained for SA- $\beta$ -galactosidase.  
297x210mm (600 x 600 DPI)

review

1  
2  
3  
4  
5  
6  
7  
8  
9  
10  
11  
12  
13  
14  
15  
16  
17  
18  
19  
20  
21  
22  
23  
24  
25  
26  
27  
28  
29  
30  
31  
32  
33  
34  
35  
36  
37  
38  
39  
40  
41  
42  
43  
44  
45  
46  
47  
48  
49  
50  
51  
52  
53  
54  
55  
56  
57  
58  
59  
60

|                  |            |            |            |             |            |             |            |
|------------------|------------|------------|------------|-------------|------------|-------------|------------|
| Donor number:    | 24         | 26         | 29         | 36          | 41         | 42          | 46         |
| Gender:          | Female     | Male       | Male       | Female      | Female     | Female      | Female     |
| Year birth:      | 1945       | 1955       | 1939       | 1967        | 1967       | 1978        | 1944       |
| Aspiration site: | Acetabulum | Acetabulum | Acetabulum | Iliac Crest | Acetabulum | Iliac Crest | Acetabulum |

Table S4 Alves et al.

Table S4. Information relative to the hMSCs donors used on this manuscript.  
297x210mm (600 x 600 DPI)

Review
